# Supplementary material for: Quantifying Prosthetic Embodiment: Interactions Between Agency, Ownership, and Peripersonal Space in a Closed-Loop Sensorimotor Task
Source: Research Square preprint supplement (doi:10.21203/rs.3.rs-7348715/v1), 2025-09-22
Supplement: Supplementary file 1 [file 922afb2b53af2a3fbe9b8f82.docx]

SUPPLEMENTAL INFORMATION

**Table1.** Embodiment Questionnaires. Rate the following statements on a scale ranging from “−3” (totally disagree) to “+3” (totally agree), with “0” indicating neither agreement nor disagreement (“uncertain”)

| **Questionnaire Type** | **Statement** |
| --- | --- |
| Ownership Questionnaires | 1. **I felt as if I was looking at my own hand.** |
| 2. **I felt as if the prosthetic hand was part of my body.** |
| 3. **It seemed as if I were sensing the movement of my finger in the location where the prosthetic finger moved.** |
| 4. **I felt as if the prosthetic hand was my hand.** |
| Ownership Control Questionnaires | 5. **I felt as if my real hand were turning hard/plastic/robotic.** |
| 6. **It seems as if I had more than one right hand.** |
| 7. **It appeared as if the prosthetic hand were drifting towards my real hand.** |
| 8. **It felt as if I had no longer a right hand, as if my right hand had disappeared.** |
| Agency Questionnaires | 9. **The prosthetic hand moved just like I wanted it to, as if it was obeying my will.** |
| 10. **I felt as if I was controlling the movements of the prosthetic hand.** |
| 11. **I felt as if I was causing the movement I saw.** |
| 12. **Whenever I moved my finger I expected the prosthetic finger to move in the same way.** |
| Agency Control Questionnaires | 13. **I felt as if the prosthetic hand was controlling my will.** |
| 14. **I felt as if the prosthetic hand was controlling my movements.** |
| 15. **I could sense the movement from somewhere between my real hand and the prosthetic hand.** |
| 16. **It seemed as if the prosthetic hand had a will of its own.** |

**Table2.** Estimated model coefficients for the agency and agency control response displayed in Figure2 generated by generalized mixed effect models (GLMMs). Link function between the linear predictor (η) and the expectation of the dependent variable (μ) is *μ = η* for each response

**Agency**

| **Characteristic** | **Estimate Coefficient** | **Std.Error** | **z-value** | **p-value** |
| --- | --- | --- | --- | --- |
| Position |  |  |  |  |
| C | — | — | — |  |
| F | -0.293 | 0.028 | -10.584 | <0.001 |
| M | -0.211 | 0.027 | -7.963 | <0.001 |
| Activity |  |  |  |  |
| 1 | — | — | — |  |
| 0 | -2.374 | 0.042 | -56.647 | <0.001 |
| Feedback |  |  |  |  |
| 1 | — | — | — |  |
| 0 | -0.344 | 0.027 | -12.895 | <0.001 |
| Position * Activity |  |  |  |  |
| F * 0 | -0.678 | 0.054 | -12.659 | <0.001 |
| M * 0 | -1.901 | 0.067 | -28.430 | <0.001 |
| Position * Feedback |  |  |  |  |
| F * 0 | 0.362 | 0.039 | 9.294 | <0.001 |
| M * 0 | 0.359 | 0.038 | 9.413 | <0.001 |
| Fit Results (ANOVA) |  |  |  |  |
| Log-likelihood | -4834.025 | BIC | 9766.728 |  |
| AIC | 9692.051 | marginal_R2 | 0.765 |  |

**Agency Control**

| **Characteristic** | **Estimate Coefficient** | **Std.Error** | **z-value** | **p-value** |
| --- | --- | --- | --- | --- |
| Position |  |  |  |  |
| C | — | — | — |  |
| F | 0.077 | 0.033 | 2.323 | 0.02 |
| M | -0.023 | 0.033 | -0.681 | 0.496 |
| Activity |  |  |  |  |
| 1 | — | — | — |  |
| 0 | 0.535 | 0.037 | 14.285 | <0.001 |
| Feedback |  |  |  |  |
| 1 | — | — | — |  |
| 0 | 0.160 | 0.033 | 4.882 | <0.001 |
| Position * Activity |  |  |  |  |
| F * 0 | -0.233 | 0.052 | -4.453 | <0.001 |
| M * 0 | -0.264 | 0.052 | -5.107 | <0.001 |
| Position * Feedback |  |  |  |  |
| F * 0 | -0.253 | 0.048 | -5.291 | <0.001 |
| M * 0 | -0.058 | 0.047 | -1.232 | 0.218 |
| Fit Results (ANOVA) |  |  |  |  |
| Log-likelihood | -3025.968 | BIC | 6150.612 |  |
| AIC | 6075.935 | marginal_R2 | 0.046 |  |

**Table3.** Estimated model coefficients for the intentional binding response displayed in Figure3 generated by generalized mixed effect models (GLMMs). Link function between the linear predictor (η) and the expectation of the dependent variable (μ) is *μ = η* for each response

| **Characteristic** | **Estimate Coefficient** | **Std.Error** | **z-value** | **p-value** |
| --- | --- | --- | --- | --- |
| Position |  |  |  |  |
| C | — | — | — |  |
| F | 15.217 | 13.024 | 1.168 | 0.243 |
| M | -7.126 | 13.024 | -0.547 | 0.584 |
| Activity |  |  |  |  |
| 1 | — | — | — |  |
| 0 | -12.077 | 13.024 | -0.927 | 0.354 |
| Feedback |  |  |  |  |
| 1 | — | — | — |  |
| 0 | -59.058 | 13.024 | -4.535 | < 0.001 |
| Position * Activity |  |  |  |  |
| F * 0 | -11.715 | 18.419 | -0.636 | 0.525 |
| M * 0 | -1.208 | 18.419 | -0.066 | 0.948 |
| Position * Feedback |  |  |  |  |
| F * 0 | -8.575 | 18.419 | -0.466 | 0.642 |
| M * 0 | 8.937 | 18.419 | 0.485 | 0.628 |
| Fit Results (ANOVA) |  |  |  |  |
| Log-likelihood | -24827.710 | BIC | 49745.874 |  |
| AIC | 49677.420 | marginal_R2 | 0.024 |  |

**Table4.** Estimated model coefficients for the ownership and ownership control response displayed in Figure4 generated by generalized mixed effect models (GLMMs). Link function between the linear predictor (η) and the expectation of the dependent variable (μ) is *μ = η* for each response

**Ownership**

| **Characteristic** | **Estimate Coefficient** | **Std.Error** | **z-value** | **p-value** |
| --- | --- | --- | --- | --- |
| Position |  |  |  |  |
| C | — | — | — |  |
| F | -0.571 | 0.060 | -9.470 | <0.001 |
| M | -0.382 | 0.060 | -6.421 | <0.001 |
| Activity |  |  |  |  |
| 1 | — | — | — |  |
| 0 | -1.321 | 0.060 | -22.085 | <0.001 |
| Feedback |  |  |  |  |
| 1 | — | — | — |  |
| 0 | -0.265 | 0.060 | -4.383 | <0.001 |
| Position * Activity |  |  |  |  |
| F * 0 | 0.169 | 0.085 | 1.997 | 0.046 |
| M * 0 | 0.419 | 0.085 | 4.934 | <0.001 |
| Position * Feedback |  |  |  |  |
| F * 0 | 0.215 | 0.084 | 2.551 | 0.011 |
| M * 0 | 0.037 | 0.087 | 0.426 | 0.670 |
| Fit Results (ANOVA) |  |  |  |  |
| Log-likelihood | -4777.620 | BIC | 9653.918 |  |
| AIC | 9579.241 | marginal_R2 | 0.208 |  |

**Ownership Control**

| **Characteristic** | **Estimate Coefficient** | **Std.Error** | **z-value** | **p-value** |
| --- | --- | --- | --- | --- |
| Position |  |  |  |  |
| C | — | — | — |  |
| F | 0.074 | 0.034 | 2.190 | 0.029 |
| M | -0.310 | 0.035 | -8.769 | <0.001 |
| Activity |  |  |  |  |
| 1 | — | — | — |  |
| 0 | -0.235 | 0.036 | -6.509 | <0.001 |
| Feedback |  |  |  |  |
| 1 | — | — | — |  |
| 0 | -0.034 | 0.034 | -0.996 | 0.319 |
| Position * Activity |  |  |  |  |
| F * 0 | -0.249 | 0.050 | -4.947 | <0.001 |
| M * 0 | -0.078 | 0.051 | -1.531 | 0.126 |
| Position * Feedback |  |  |  |  |
| F * 0 | -0.144 | 0.048 | -3.004 | 0.003 |
| M * 0 | 0.174 | 0.048 | 3.593 | <0.001 |
| Fit Results (ANOVA) |  |  |  |  |
| Log-likelihood | -3025.968 | BIC | 6150.612 |  |
| AIC | 6075.935 | marginal_R2 | 0.046 |  |

**Table5.** Estimated model coefficients for the peripersonal space response displayed in Figure5 generated by generalized mixed effect models (GLMMs). Link function between the linear predictor (η) and the expectation of the dependent variable (μ) is *μ = η* for each response

| **Characteristic** | **Estimate Coefficient** | **Std.Error** | **z-value** | **p-value** |
| --- | --- | --- | --- | --- |
| Position |  |  |  |  |
| C | — | — | — |  |
| F | 3.754 | 0.185 | 20.330 | <0.001 |
| M | 3.230 | 0.187 | 17.260 | <0.001 |
| Activity |  |  |  |  |
| 1 | — | — | — |  |
| 0 | 0.131 | 0.168 | 0.777 | 0.437 |
| Feedback |  |  |  |  |
| 1 | — | — | — |  |
| 0 | -0.108 | 0.184 | -0.586 | 0.558 |
| Position * Activity |  |  |  |  |
| F * 0 | -0.344 | 0.263 | -1.304 | 0.192 |
| M * 0 | -0.352 | 0.232 | -1.517 | 0.129 |
| Position * Feedback |  |  |  |  |
| F * 0 | -1.251 | 0.263 | -4.757 | <0.001 |
| M * 0 | -1.178 | 0.254 | -4.645 | <0.001 |
| Fit Results (ANOVA) |  |  |  |  |
| Log-likelihood | -9300.979 | BIC | 18700.635 |  |
| AIC | 18625.958 | marginal_R2 | 0.130 |  |
